# Supplementary material for: Designing an efficient graphene quantum dot-filled luminescent down shifting layer to improve the stability and efficiency of perovskite solar cells by simple optical modeling
Source: Royal Society of Chemistry journal article supplement (doi:10.1039/c8ra06196c), 2018-01-01
Supplement: c8ra06196c1.pdf [file c8ra06196c1.pdf]

Supporting Information for

## Designing an efficient Graphene Quantum Dot-Filled Luminescent Down Shifting Layer to Improve the Stability and Efficiency of Perovskite Solar Cell by Simple Optical Modeling

Zahra Hosseini and Teymoor Ghanbari

Faculty of Advanced Technologies, Shiraz University, Shiraz 71946-84560 Iran

\*Corresponding author: zahrahosseini@shirazu.ac.ir

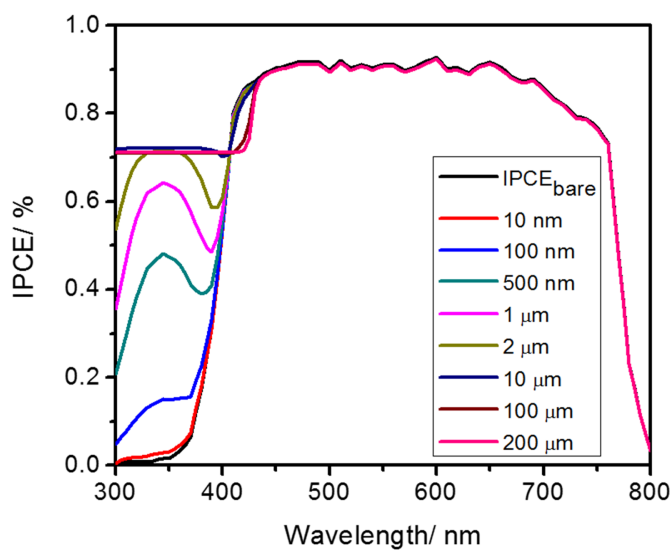

Fig. S1. Calculated total IPCE spectra for PSCs without and with GQD-EDA-filled LDS layers of different thicknesses.

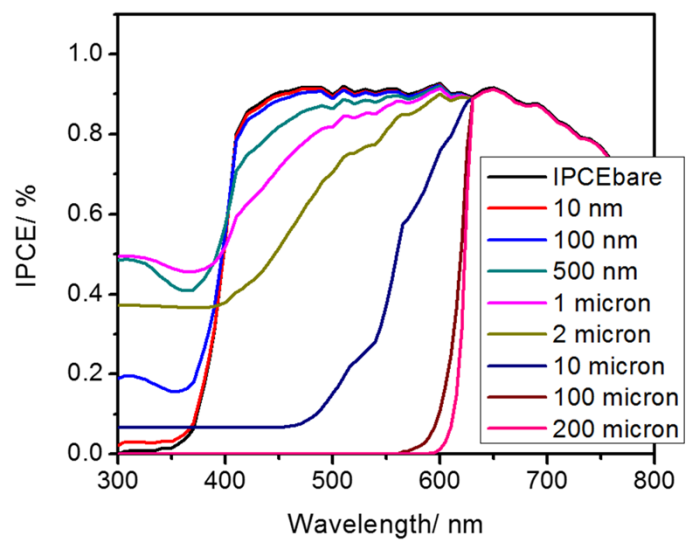

Fig. S2. Calculated total IPCE spectra for PSCs without and with GQD-G-filled LDS layers of different thicknesses.
